# Supplementary material for: Genetic and neuronal regulation of sleep by neuropeptide VF
Source: eLife journal article supplement (doi:10.7554/elife.25727), 2017-11-06
Supplement: supp [file elife-25727-supp-v1.zip]

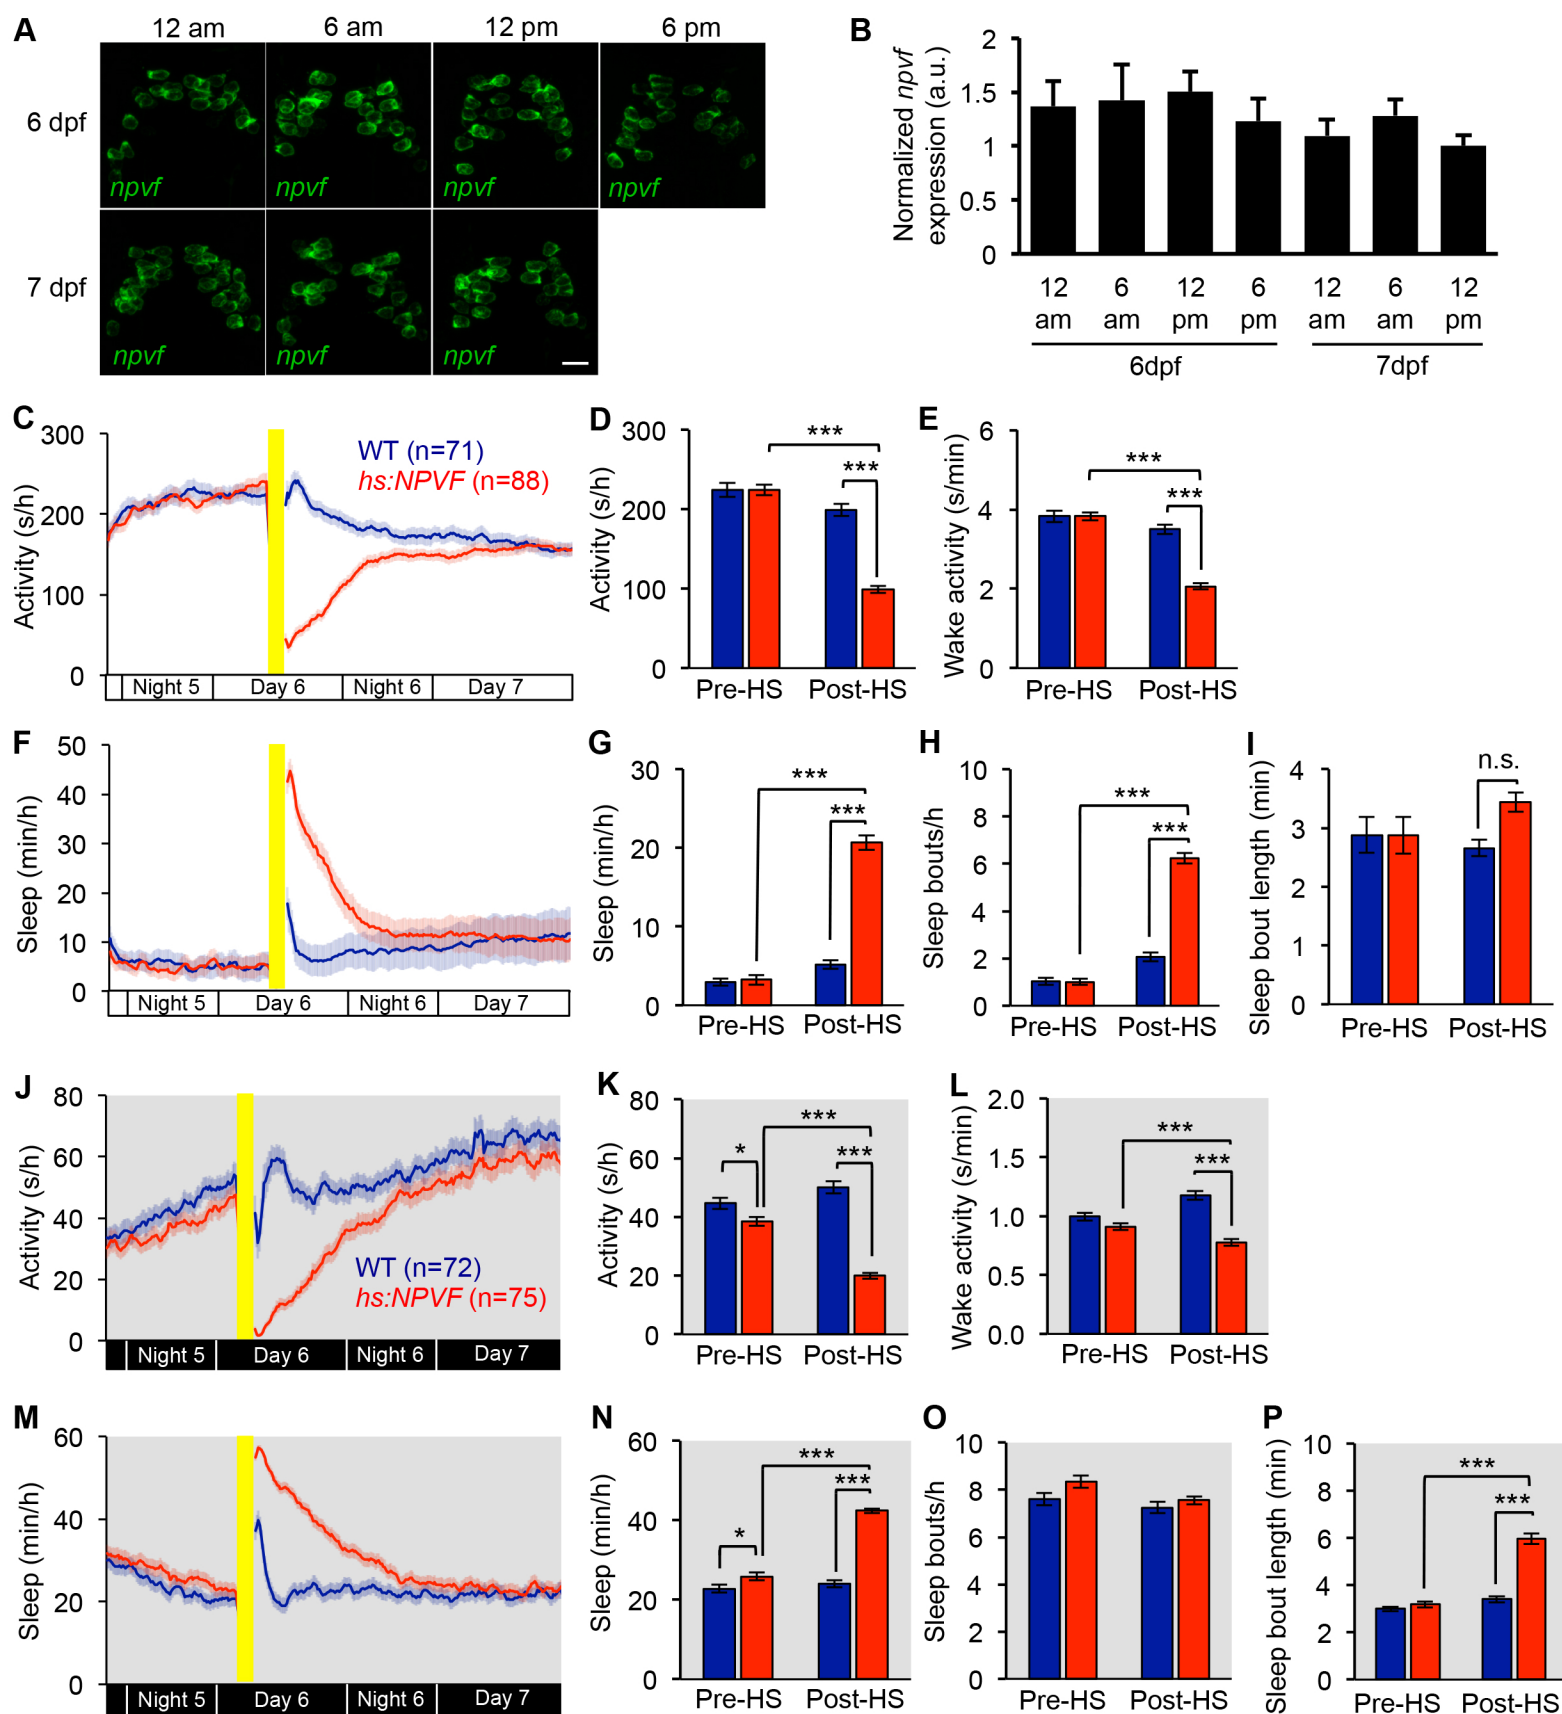

**Figure 1 – Figure Supplement 3. *npvf* expression levels do not vary in a circadian manner and NPVF overexpression-induced sleep does not require entrained behavioral circadian rhythms.**
