# Supplementary material for: Genetic and neuronal regulation of sleep by neuropeptide VF
Source: eLife journal article supplement (doi:10.7554/elife.25727), 2017-11-06
Supplement: supp [file elife-25727-supp-v1.zip]

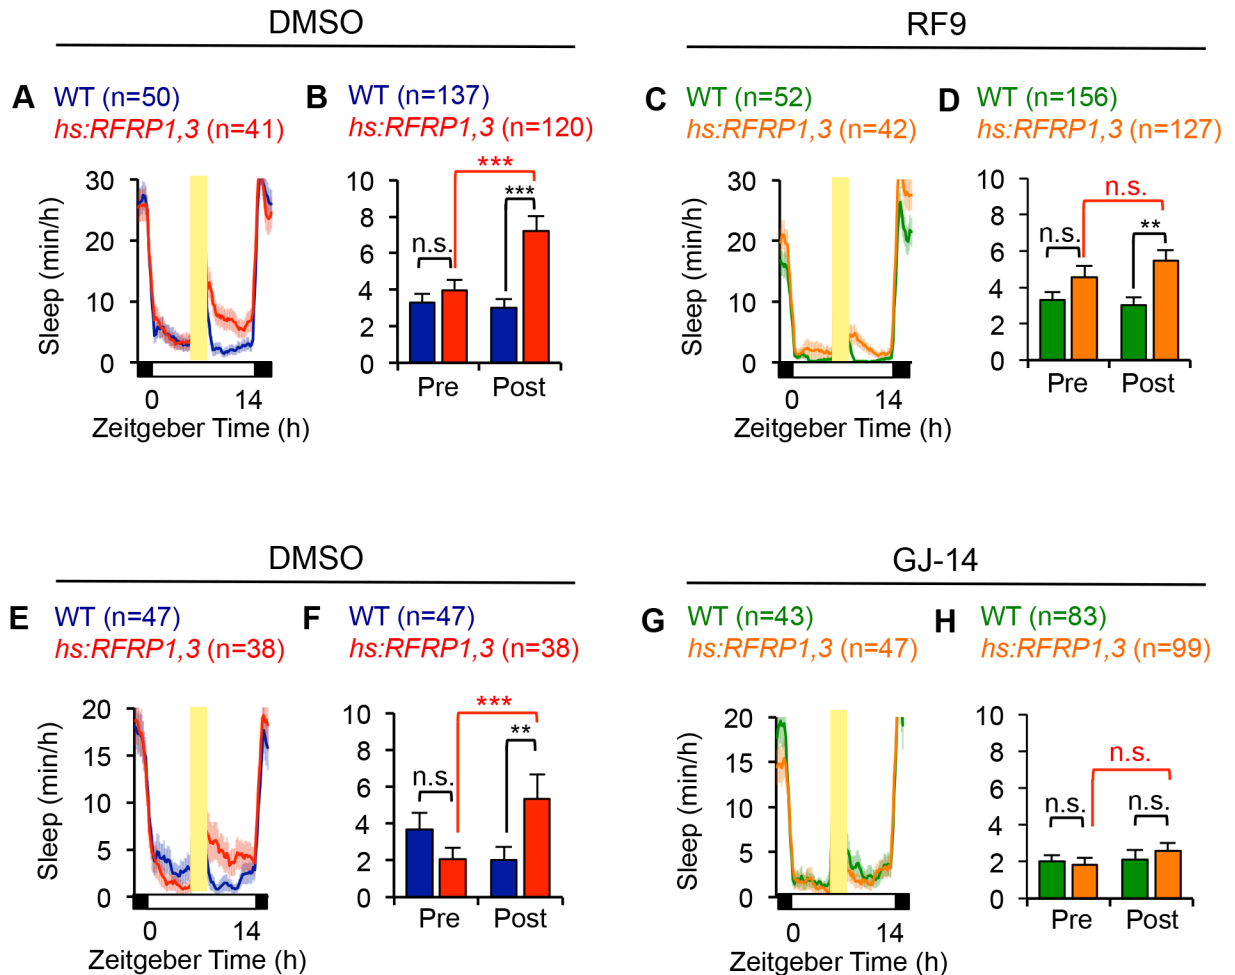

### Figure 3 – Figure Supplement 2

#### Pharmacological inhibition of NPVF signaling suppresses RFRP-overexpression induced sleep.

(A,B,E,F) Following DMSO vehicle treatment, RFRP1,3 overexpression increased sleep in transgenic animals compared to WT siblings and to pre-HS (red bracket comparison). Following treatment with either RF9 (C,D) or GJ-14 (G,H), RFRP1,3 overexpression had no sleep effect post-HS compared to pre-HS (red bracket comparison). Yellow bars indicate heat shock. Pre- and Post-HS data is calculated for the day of HS. White and black bars under behavioral traces indicate day (14 hours) and night, respectively. Mean  $\pm$  SEM from one representative experiment (A,C,E,F,G), or two (H) or three (B,D) pooled experiments are shown. n=number of animals. DMSO vehicle and drug treated siblings were from the same clutch (A-D, E-H), but were tested in different videotrackers due to the numerous comparisons being made. n.s.=not significant, \*\* $P<0.01$ , \*\*\* $P<0.005$  by Two-way ANOVA with Holm-Sidak test.
