# Supplementary material for: Genetic and neuronal regulation of sleep by neuropeptide VF
Source: eLife journal article supplement (doi:10.7554/elife.25727), 2017-11-06
Supplement: supp [file elife-25727-supp-v1.zip]

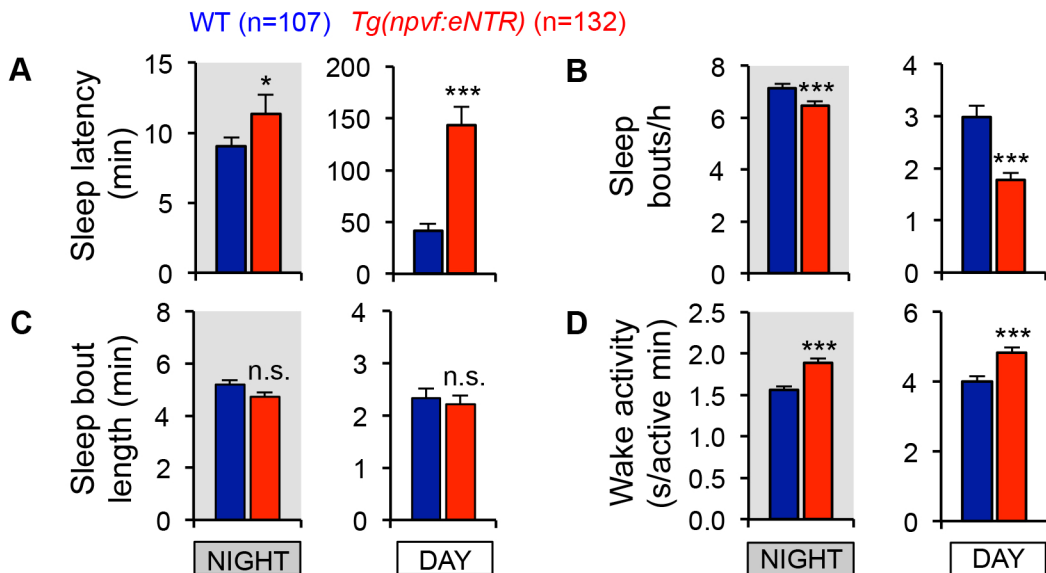

**Figure 6 – Figure Supplement 1.**  
**Chemogenetic ablation of NPVF neurons alters sleep/wake architecture.**

*Tg(npvf:mTagYFP-T2A-eNTR)* animals and their WT siblings were treated with 5 mM MTZ. Bar graphs show mean  $\pm$  SEM from 3 pooled experiments, with measurements of sleep latency (time to first sleep bout after light transitions) (**A**), sleep bouts per hour (**B**), sleep bout length (**C**), and wake activity (**D**). n=number of animals. n.s.=not significant, \* $P$ <0.05, \*\*\* $P$ <0.0001 by Student's *t*-test.
