# Supplementary material for: Genetic and neuronal regulation of sleep by neuropeptide VF
Source: eLife journal article supplement (doi:10.7554/elife.25727), 2017-11-06
Supplement: supp [file elife-25727-supp-v1.zip]

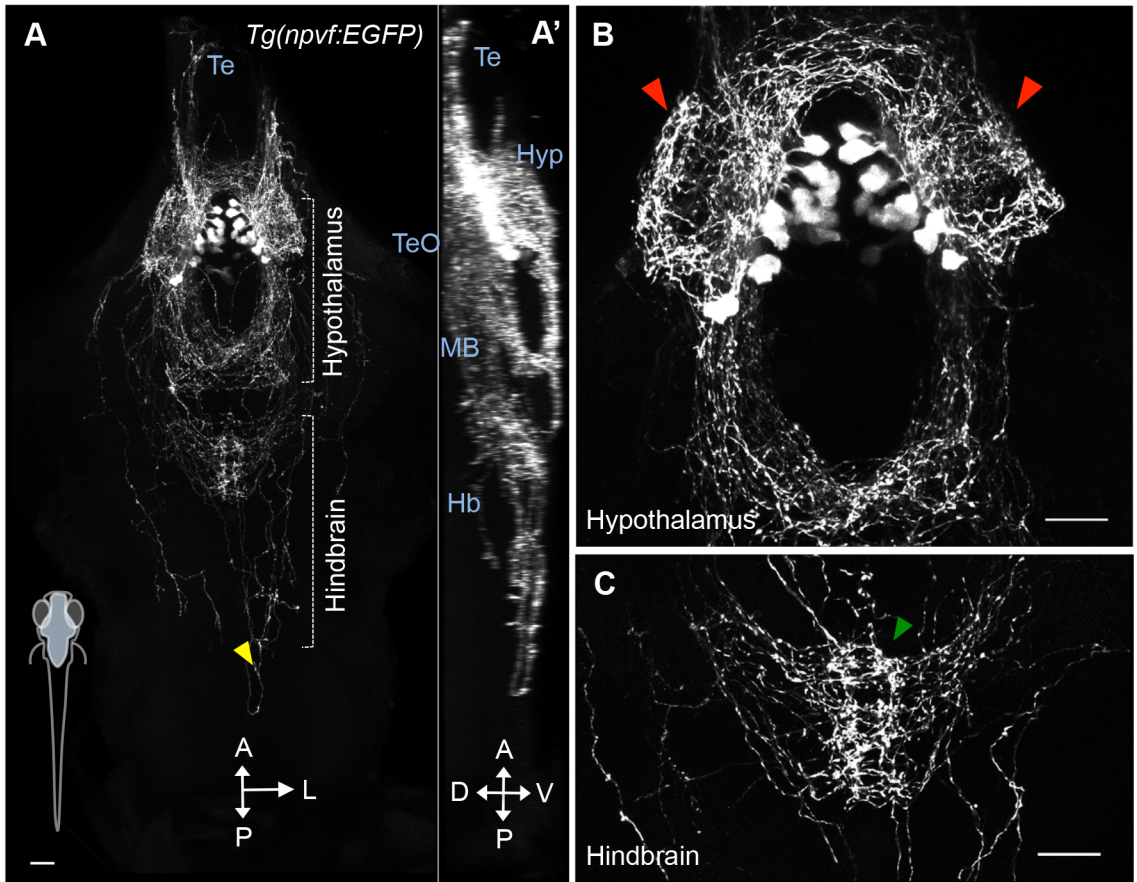

## Figure 5 – Figure Supplement 2.

### NPVF neuronal projections

(A) A 101  $\mu\text{m}$  thick maximum intensity projection image of a 5-dpf *Tg(npvf:EGFP)* brain. Imaging plane is denoted in blue in schematic at bottom left. Bracketed areas are magnified in (B,C). NPVF neurons have dense projections within the hypothalamus (red arrowheads) (B), sparse projections to the forebrain (A,A') and tectum (A'), projections that converge on the raphe nuclei in the hindbrain (green arrowhead) (C), and sparse projections that extend down the spinal cord (yellow arrowhead) (A). Scale: 50  $\mu\text{m}$  (A), 20  $\mu\text{m}$  (B,C). Te = telencephalon; TeO = tectum; Hyp = hypothalamus; MB = midbrain; Hb = hindbrain; A = anterior; P = posterior; L = lateral; D = dorsal; V = ventral.
