# Supplementary material for: Genetic and neuronal regulation of sleep by neuropeptide VF
Source: eLife journal article supplement (doi:10.7554/elife.25727), 2017-11-06
Supplement: supp [file elife-25727-supp-v1.zip]

**A**

|             |                                                                          | RFRP1 | RFRP2 | RFRP3 |     |
|-------------|--------------------------------------------------------------------------|-------|-------|-------|-----|
| NPVF WT     | MSYFALLSLALGILSSFMLSEVTALRLPLSGERDLNGFTWQGFSENAQEIPRSLEIQDFTLNVAPTSGGASS |       |       |       | 72  |
| NPVF Mutant | MSYFALLSLALGILSSFMLSEVTALRLPLSGERDLNGFTWQGFSENAQEIPRSLEIQDFTLNVAPTSGGASS |       |       |       | 72  |
| NPVF WT     | PTILRLHPIIPKPAHLHANLPLRFGRDAQPGTGDRAPKSTINLPQRFGRSCTMCARSGTGPSATLPQRFGRR |       |       |       | 144 |
| NPVF Mutant | PTILRLHPIIPKPAHLHANLPLRFGRDAQPGTGDRALPSTSLSDLAAPVPCVHGRGPDQPFSRSGLAGGTF  |       |       |       | 144 |
| NPVF WT     | NIFALDPLRALALYTRTPESPSFPKERTQVHDYMFETVEDSEETVKNTDYTALD                   |       |       |       | 198 |
| NPVF Mutant | LL                                                                       |       |       |       | 146 |

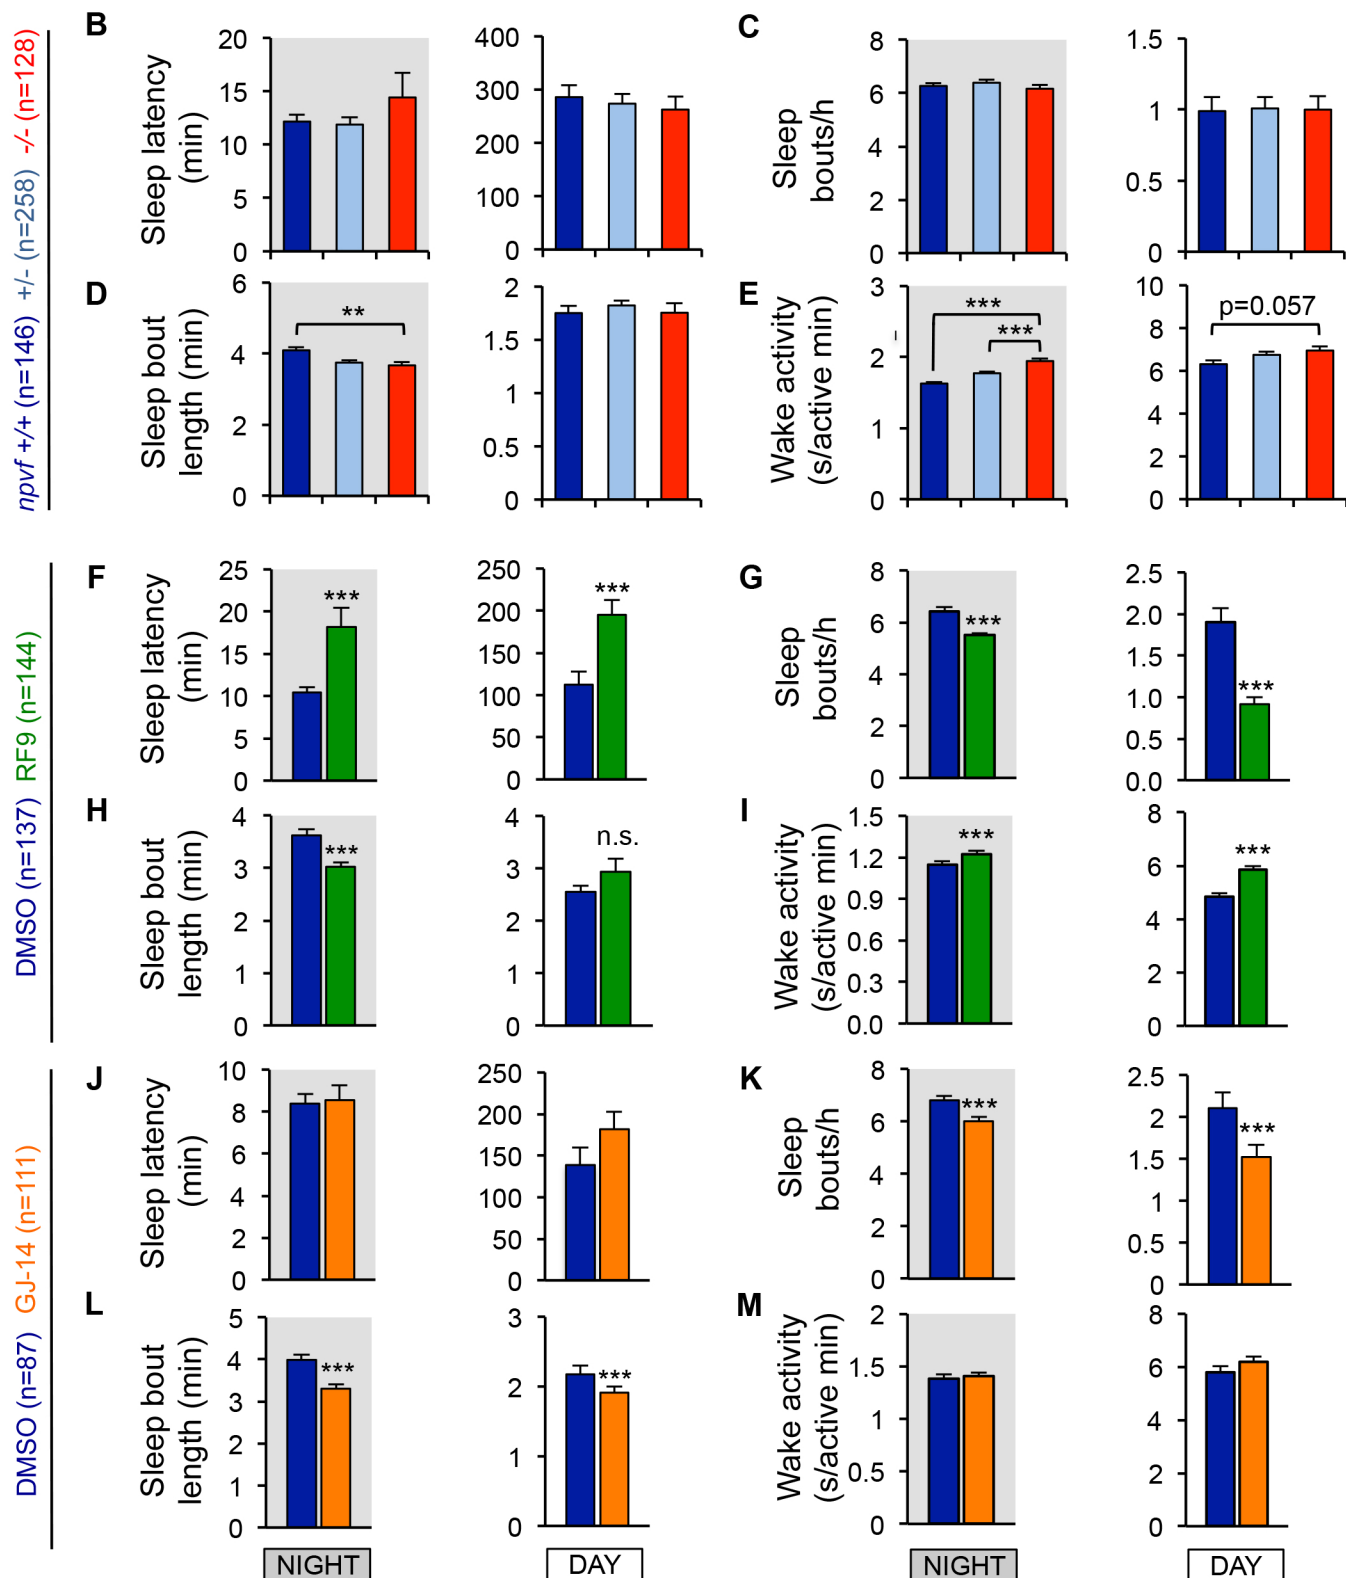

**Figure 3 – Figure Supplement 1. Genetic and pharmacological inhibition of NPVF signaling alters sleep/wake architecture.**
