# Supplementary material for: Genetic and neuronal regulation of sleep by neuropeptide VF
Source: eLife journal article supplement (doi:10.7554/elife.25727), 2017-11-06
Supplement: supp [file elife-25727-supp-v1.zip]

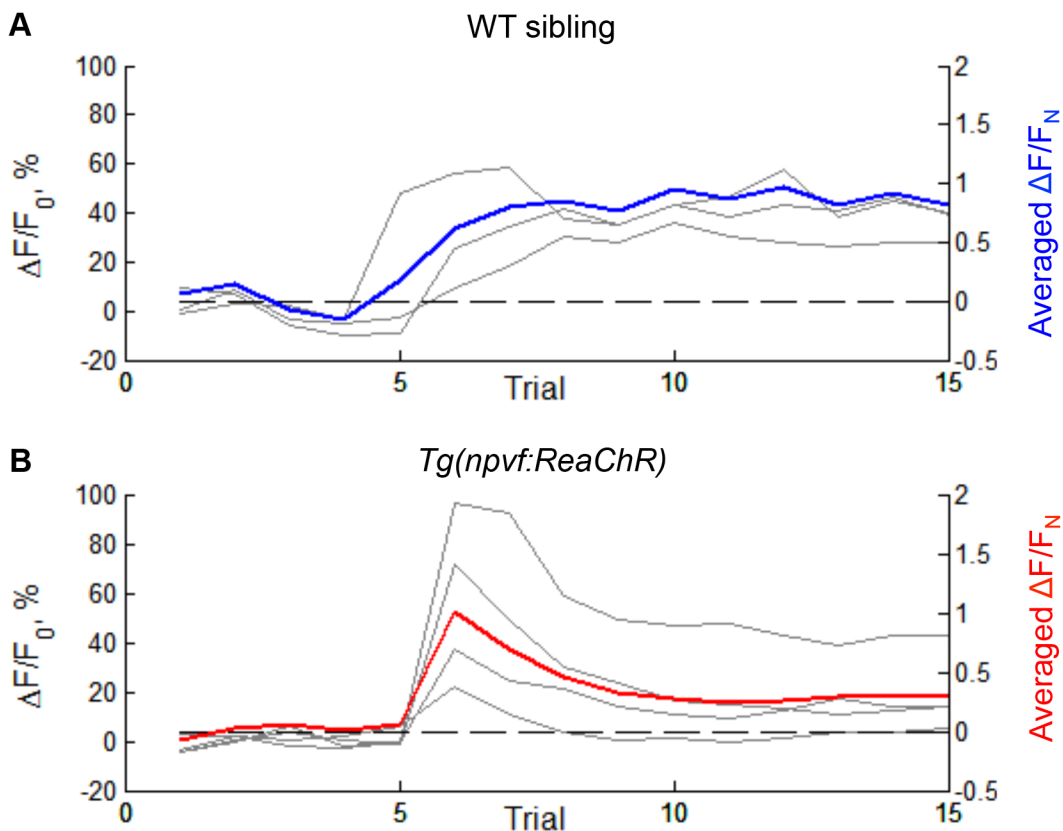

**Figure 7 – Figure Supplement 1.**

**Effect of optogenetic stimulation of NPVF neurons on GCaMP6s fluorescence in the tectum of individual animals.**

Neural activity recorded for individual *Tg(elavl3:H2B-GCaMP6s)* (A) and *Tg(elavl3:H2B-GCaMP6s); Tg(npvf:ReaChR-mCitrine)* (B) animals that are quantified in (Figure 7G). Grey lines represent individual animals. Blue and red lines represent the averaged normalized value of all animals tested. Signal is calculated as  $\Delta F = F - F_0$  with baseline  $F_0$  = averaged signal over the first 5 trials. The normalization is done with  $F_N$  = peak of signal after red light is turned on (after trial 5), for the same animal. Averaging is carried out after normalization.
