# Supplementary figures and images for: Genetic and neuronal regulation of sleep by neuropeptide VF
Source: eLife journal article supplement (doi:10.7554/elife.25727), 2017-11-06

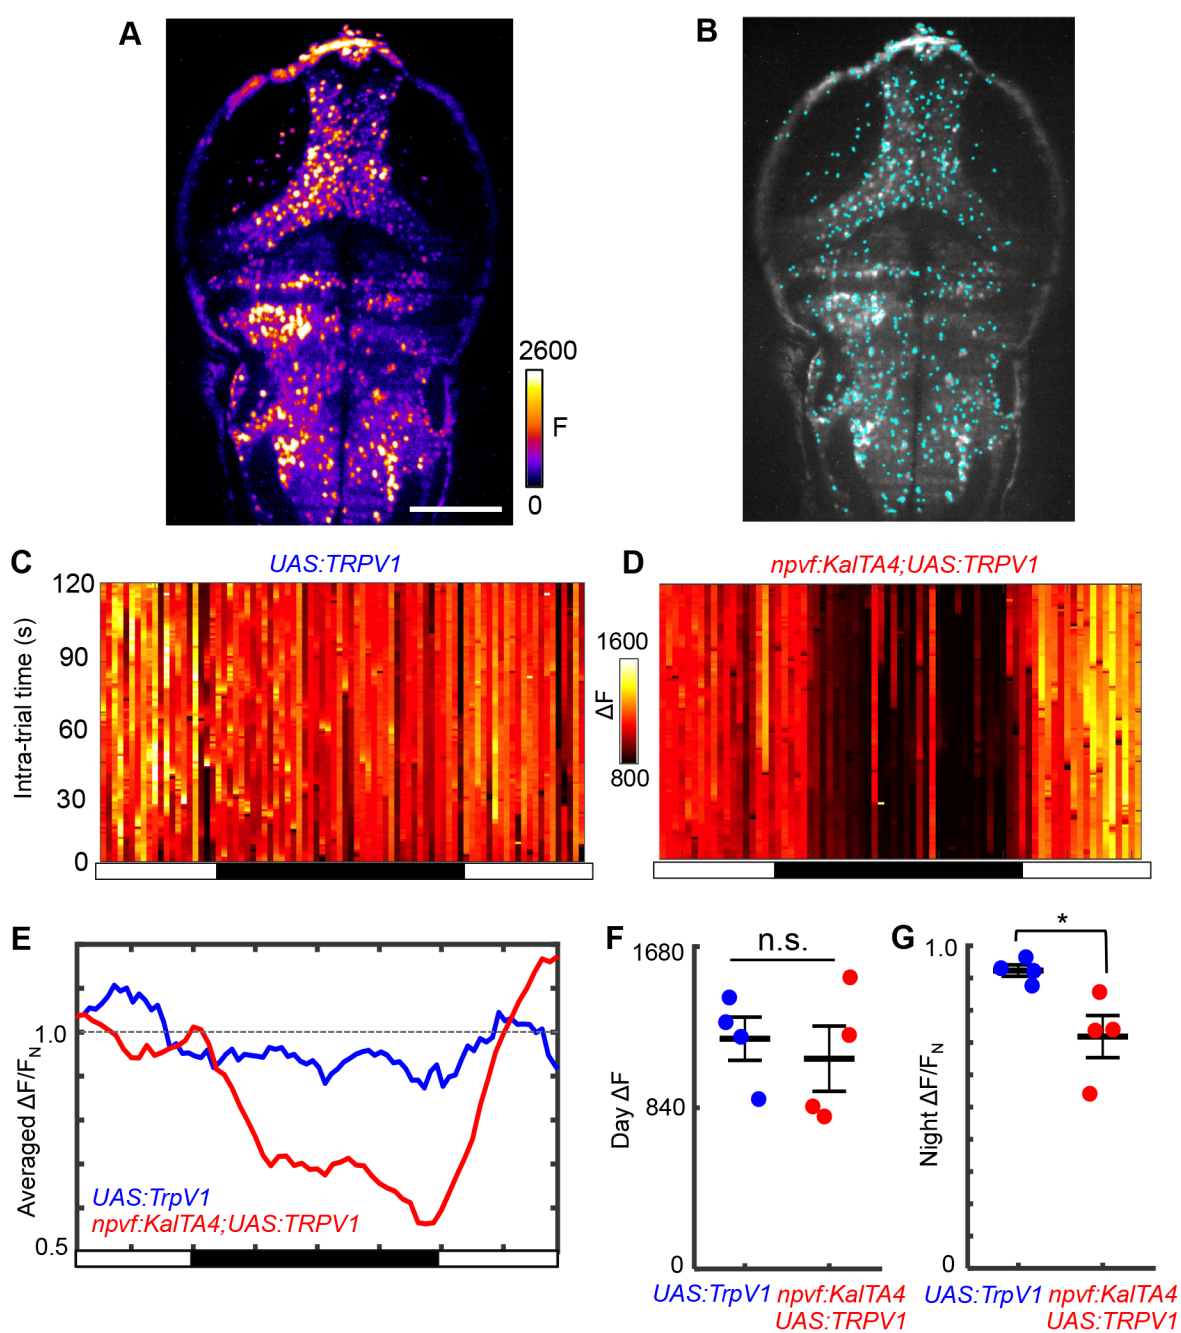

Supplement: supp [file elife-25727-supp-v1.zip]

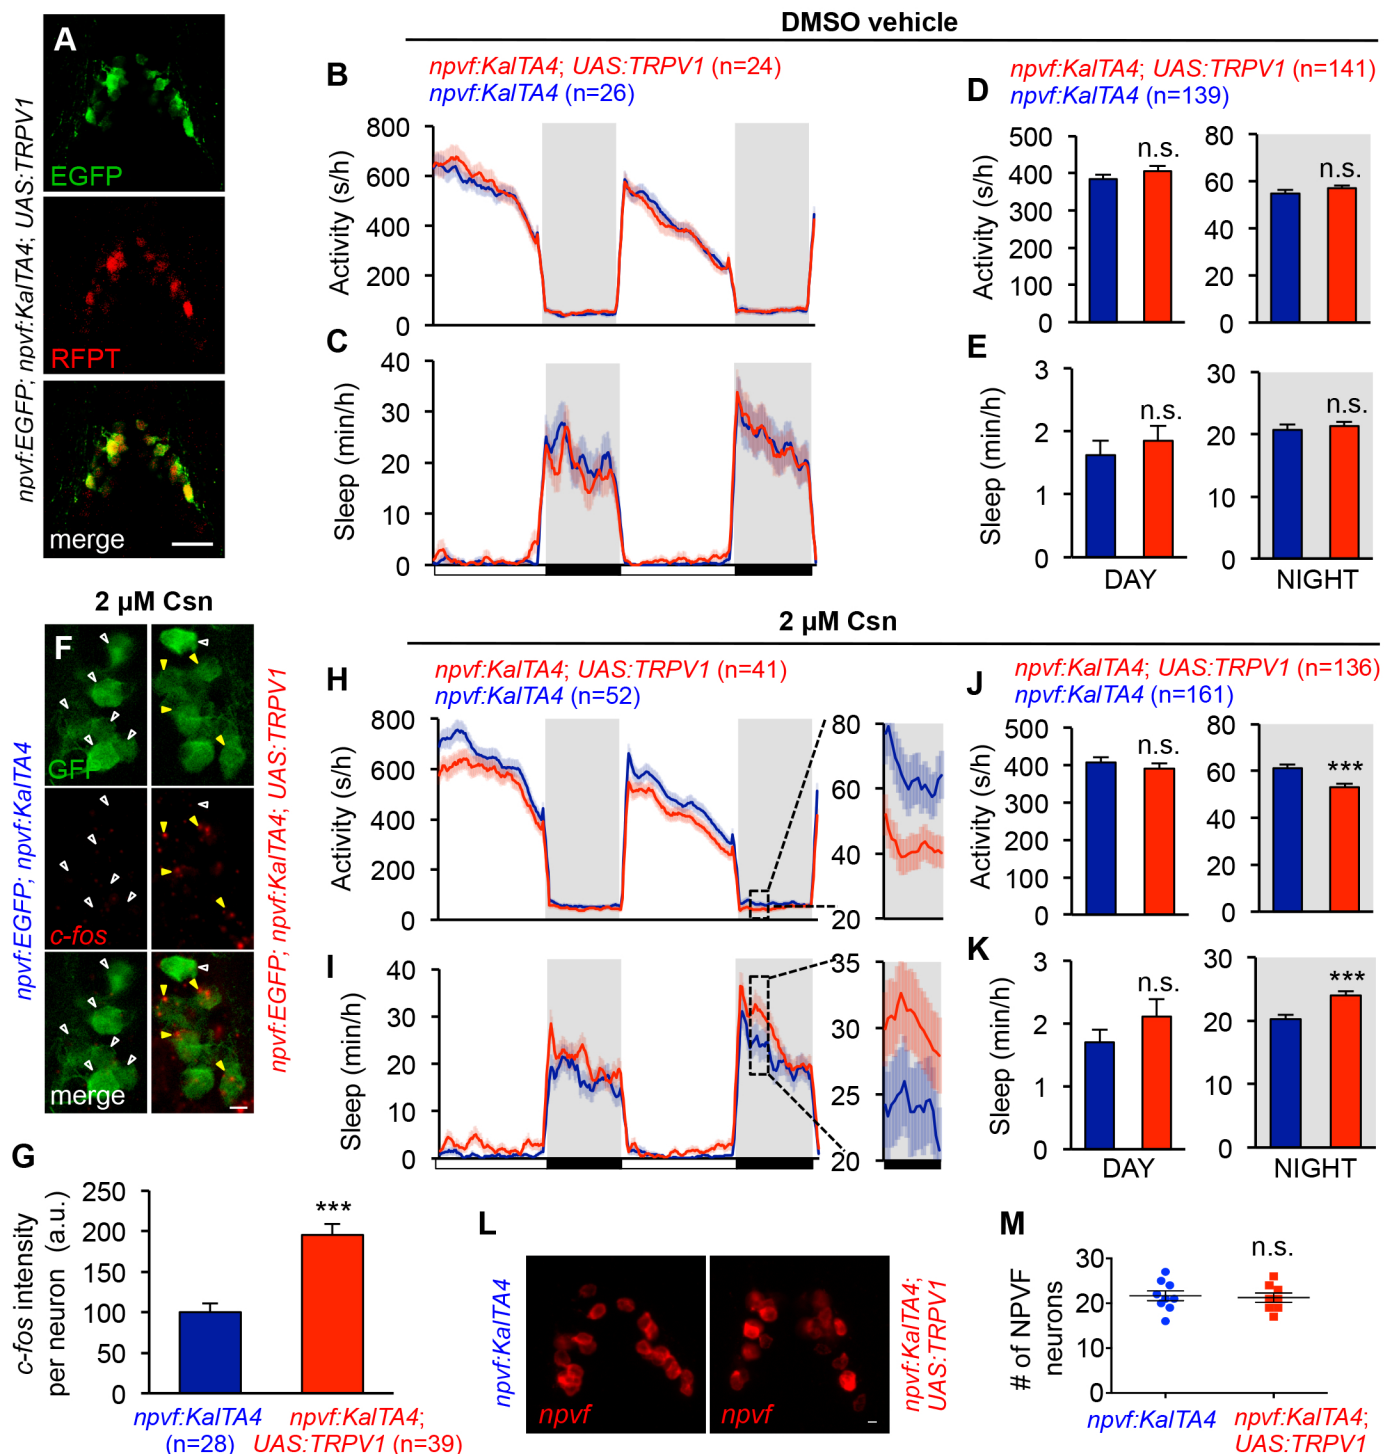

Supplement: supp [file elife-25727-supp-v1.zip]

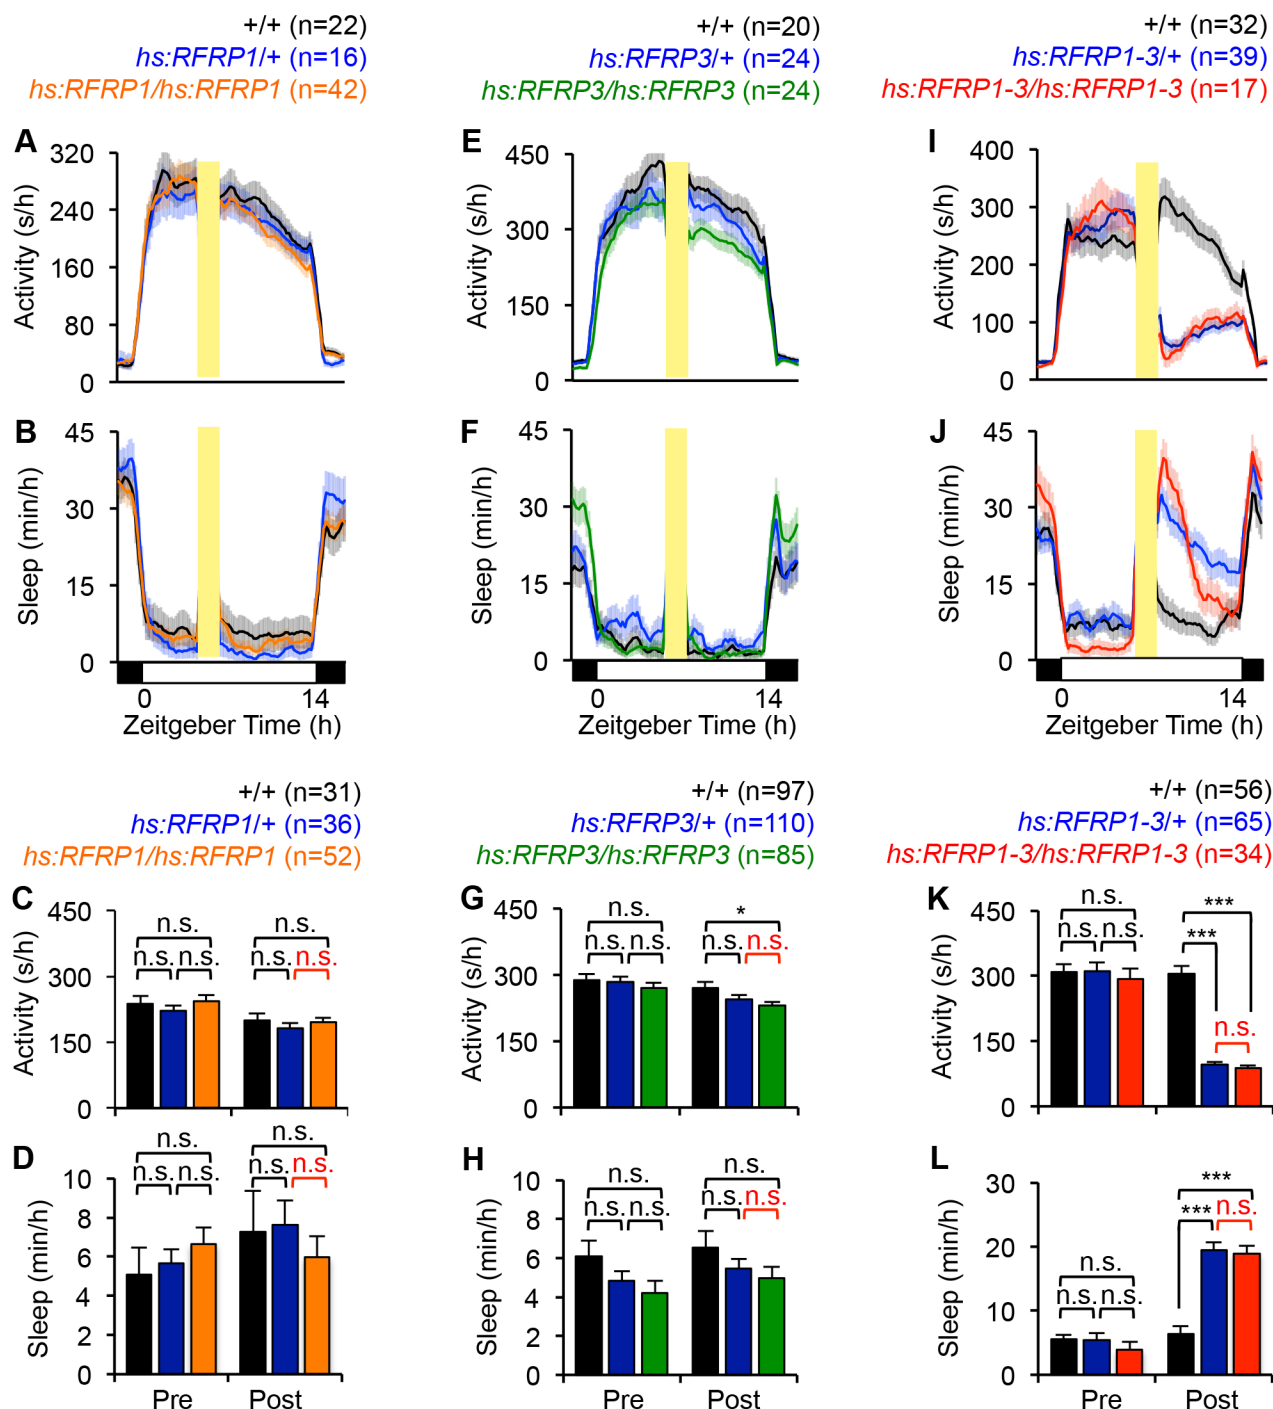

Supplement: supp [file elife-25727-supp-v1.zip]

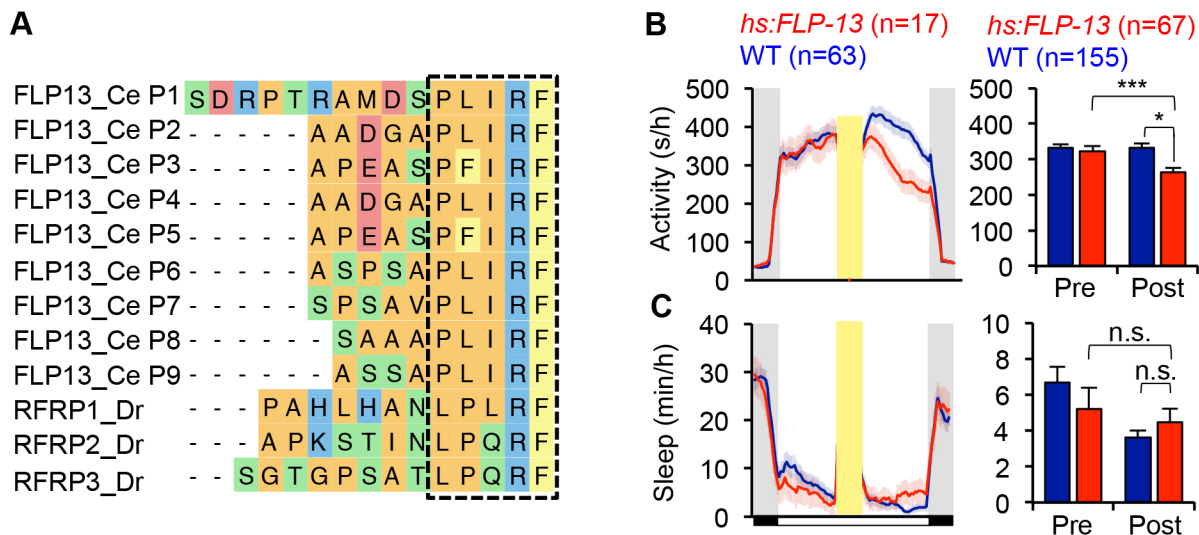

Supplement: supp [file elife-25727-supp-v1.zip]
